# Supplementary material
Source: publisher figshare collection journal article supplement (https://gsajournals.figshare.com/ndownloader/files/17706194)
Supplement: Supplementary file 1 [file 17706194]

Cycle	All Sites	Noncoding	Synonymous	Nonsynonymous	Deleterious
All	0.17	0.168	0.186	0.165	0.122
C0	0.191	0.188	0.21	0.189	0.148
C1	0.186	0.184	0.204	0.183	0.138
C2	0.161	0.16	0.177	0.157	0.115
C3	0.152	0.151	0.166	0.146	0.105
